# Supplementary material
Source: Springer Nature journal article supplement (https://www.springermedizin.de/resource/supplementary/13000_2013_1097_MOESM6_ESM.pdf/9625756)

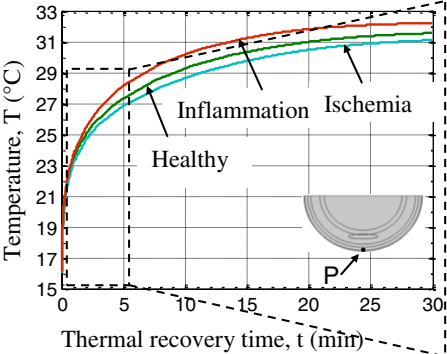

(a)

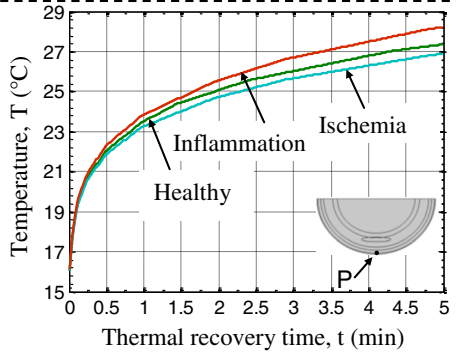

(b)

Supplement: MOESM6 [file 9625756]
